# Supplementary material for: Amplicon-Based Next Generation Sequencing for Rapid Identification of Rickettsia and Ectoparasite Species from Entomological Surveillance in Thailand
Source: MDPI journal article supplement (doi:10.3390/pathogens10020215), 2021-02-16
Supplement: s1 [file s1]

**Table S1.** The number of animals infested with ectoparasites as well as the number (percentage) of animals infested with *Rickettsia*-PCR positive fleas or ticks.

| Type of animal host | N   | Number of animals infested with ticks | Number of animals infested with <i>Rickettsia</i> -PCR positive ticks | Number of animals infested with fleas | Number of animals infested with <i>Rickettsia</i> -PCR positive fleas |
|---------------------|-----|---------------------------------------|-----------------------------------------------------------------------|---------------------------------------|-----------------------------------------------------------------------|
| Dogs                | 116 | 64                                    | 3 (4.7%)                                                              | 84                                    | 68 (81.0%)                                                            |
| Cats                | 7   | 0                                     | 0                                                                     | 7                                     | 1 (14.3%)                                                             |
| Cattle              | 2   | 2                                     | 0                                                                     | 0                                     | 0                                                                     |

**Table S2.** The number of dogs infested with ectoparasites and screened for *Rickettsia* DNA as well as *Rickettsia* species detected from ectoparasites collected from them.

| Ectoparasite types | Number of dogs infested with ectoparasites | Number of animals infested with <i>Rickettsia</i> -PCR positive ticks or fleas | Number of dogs infested with <i>Rickettsia</i> species-PCR positive fleas (N=68) |                            |                                                       |
|--------------------|--------------------------------------------|--------------------------------------------------------------------------------|----------------------------------------------------------------------------------|----------------------------|-------------------------------------------------------|
|                    |                                            |                                                                                | <i>R. asembonensis</i>                                                           | <i>Ca. R. senegalensis</i> | <i>R. asembonensis</i> and <i>Ca. R. senegalensis</i> |
| Ticks only         | 32                                         | 2 (6.3%)*                                                                      | 0                                                                                | 0                          | 0                                                     |
| Fleas only         | 52                                         | 42 (80.8%)                                                                     | 31                                                                               | 5                          | 6                                                     |
| Ticks and fleas    | 32                                         | 27 (84.4%) <sup>#</sup>                                                        | 24                                                                               | 1                          | 1                                                     |
| <b>Total</b>       | <b>116</b>                                 | <b>71 (61.2%)</b>                                                              | <b>55</b>                                                                        | <b>6</b>                   | <b>7</b>                                              |

\*One was infected with *Ca. R. senegalensis*, another was infected with *R. heilongjiangensis*; <sup>#</sup>Only one tick pool was positive for *R. heilongjiangensis*.
